# Supplementary material
Source: PubMed Central journal article supplement (PMC419677)

# a monotonic persistent firing **Controls**

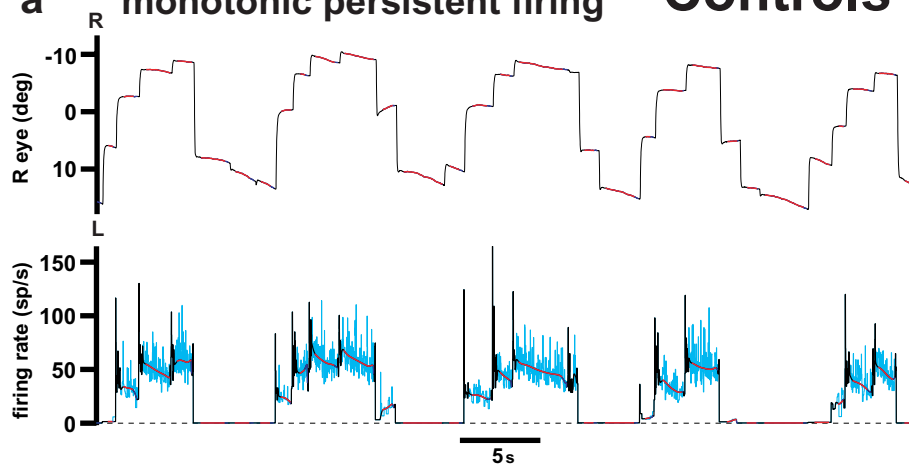

# firing rate-eye position

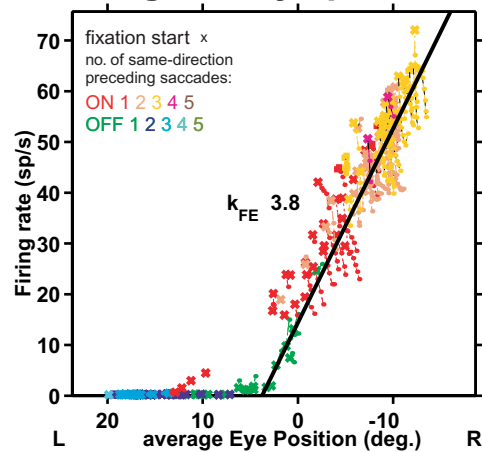

# b non-monotonic persistent firing

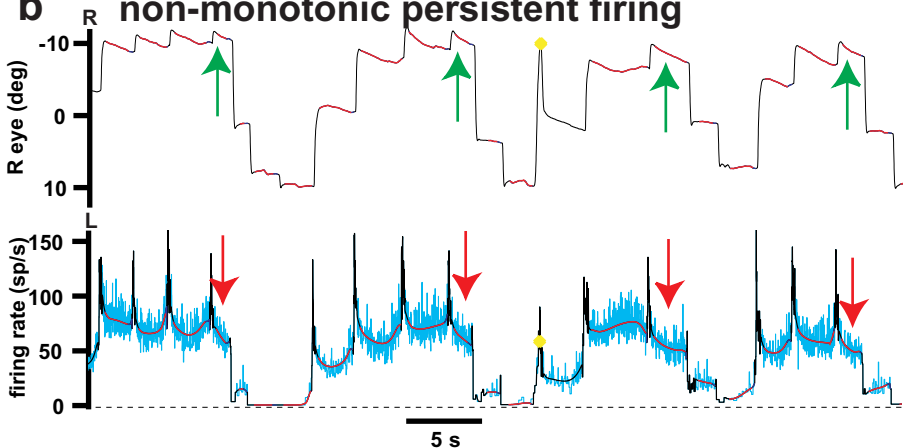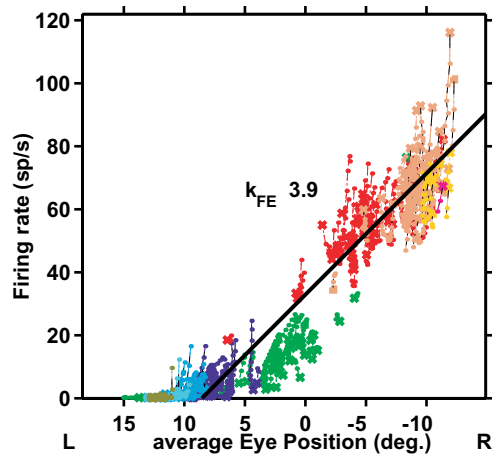

# c non-monotonic persistent firing

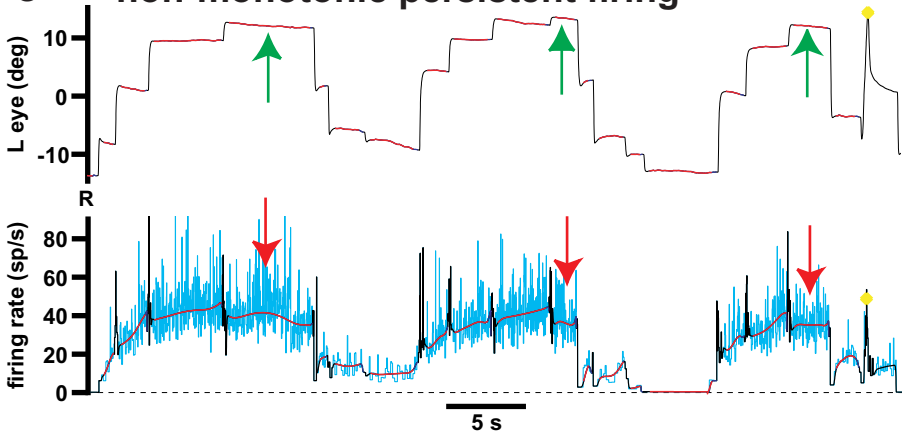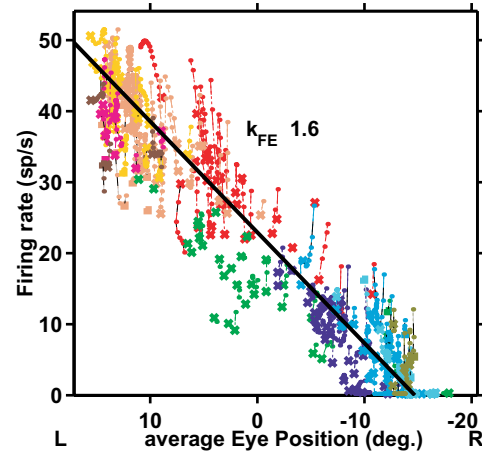

Supplement: pnas_101_20_7745__3.pdf [file pnas_101_20_7745__3.pdf]
